# Supplementary material for: Ultrahigh power output and durable flexible all-polymer triboelectric nanogenerators enabled by rational surface engineering
Source: Royal Society of Chemistry journal article supplement (doi:10.1039/d2ta09975f), 2023-01-01
Supplement: d2ta09975f1.pdf [file d2ta09975f1.pdf]

## Electronic Supplementary Information

# Ultrahigh power output and durable flexible all-polymer triboelectric nanogenerators enabled by rational surface engineering

Ying-Ying Chen, T. S. T. Balamurugan, Chih-Yu Chang\*, Chih-Yuan Hsu, Chih-Yu Fang, Yi-Shan Liu, Li-Fu Ho

Department of Materials Science and Engineering, National Taiwan University of Science and Technology, Taipei, 10607, Taiwan (R.O.C.) (E-mail: [cychang@gapps.ntust.edu.tw](mailto:cychang@gapps.ntust.edu.tw))

**Table S1.** Comparison of the output characteristics of state-of-the-art semi-transparent TENG as well as the present work.

| Source      | Triboelectric materials                 | $V_{oc}$ [Volt] | $I_{sc}$ [ $\mu$ A] | Power density [ $W\ m^{-2}$ ] |
|-------------|-----------------------------------------|-----------------|---------------------|-------------------------------|
| Reference 1 | IL + PDMS                               | 150             | 45                  | 3                             |
| Reference 2 | SF coated PET + PET                     | 213.9           | —                   | 0.068                         |
| Reference 3 | Electric wire + PVC gel                 | 24.7            | 0.83                | 0.087                         |
| Reference 4 | Graphene + nest-like porous PDMS        | 271             | 7.8                 | 0.975                         |
| Reference 5 | Chitosan and starch mixture + FEP       | 1080            | 27                  | 5.07                          |
| Reference 6 | AgNW + PDMS                             | 66              | 8.6                 | 0.446                         |
| Reference 7 | PUA + AgNW-embedded PEDOT:PSS           | 160             | $\approx$ 50        | 15                            |
| Reference 8 | Al + FP                                 | 444.8           | 44.2                | 0.818                         |
| This work   | PEDOT:PSS/cPLL + PDMS/ $F_{17}$ polymer | 688             | 33.0                | 13.4                          |

Abbreviation: IL, ionic liquid; SF-coated PET, silk-fibroin patch-film on the polyethylene terephthalate; PVC, polyvinyl chloride; FEP, fluorinated ethylene propylene; AgNW, silver nanowires; PUA, polyurethane acrylate; FP, fluoropolymer.

Note: “—” in the table implies that the data are not recorded in research.

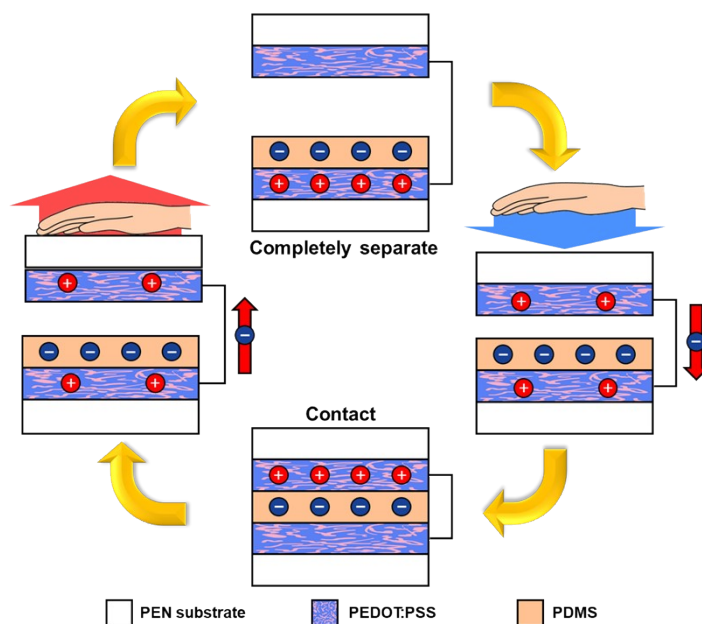

**Fig. S1.** Schematic illustration of the working principle of TENG investigated in this study.

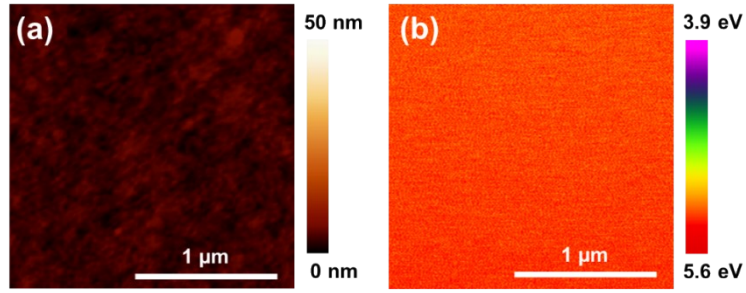

Fig. S2. (a) AFM topographic and (b) KPFM images of PEDOT:PSS layer.

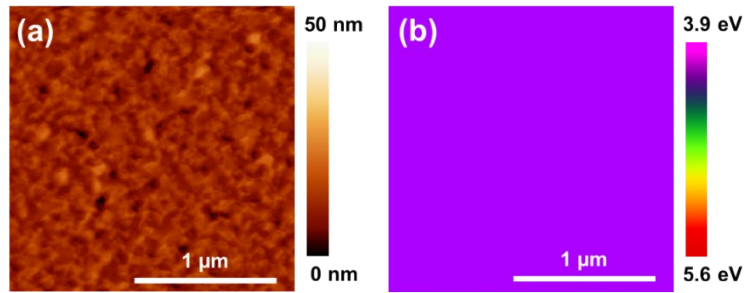

Fig. S3. (a) AFM topographic and (b) KPFM images of Al layer.

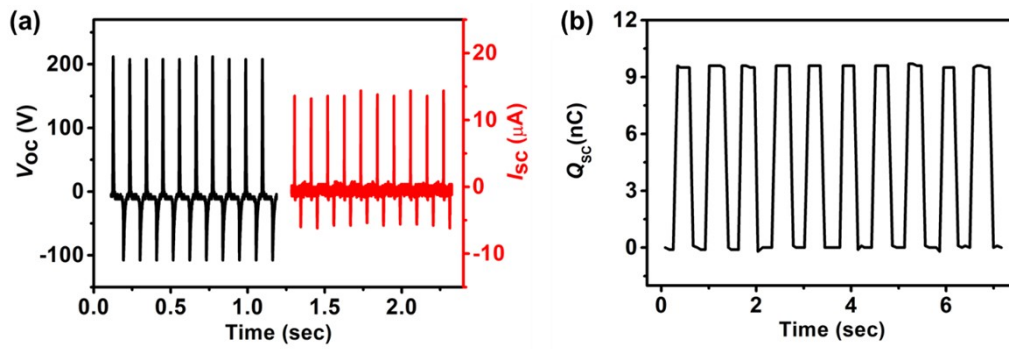

Fig. S4. Output characteristics of as-fabricated TENG with PDMS dielectric layer and Al electrode: (a)  $V_{oc}$  and  $I_{sc}$  and (b)  $Q_{sc}$ .

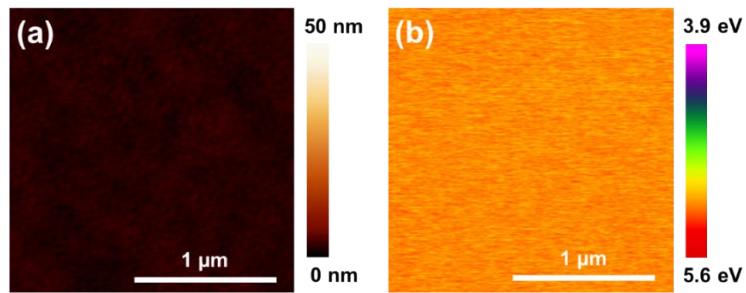

Fig. S5. (a) AFM topographic and (b) KPFM images of PDMS layer.

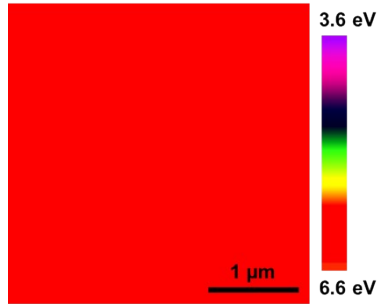

**Fig. S6.** KPFM image of PDMS/ $F_{17}$  SAM sample.

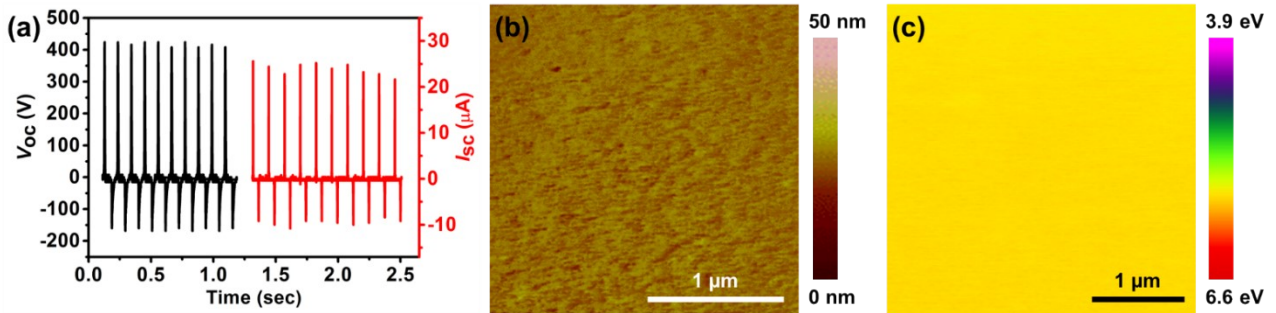

**Fig. S7.** (a) Output characteristics of as-fabricated all-polymer flexible TENG based on  $F_{17}$  polymer processed under ambient air. (b) AFM topographic and (c) KPFM images of PDMS layer.

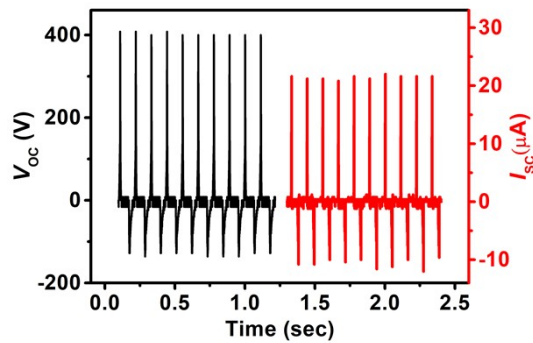

**Fig. S8.** Output characteristics of as-fabricated  $F_{17}$  polymer-functionalized PDMS TENG using Al electrode ( $V_{oc} = 408$  V,  $I_{sc} = 21.6$   $\mu$ A)

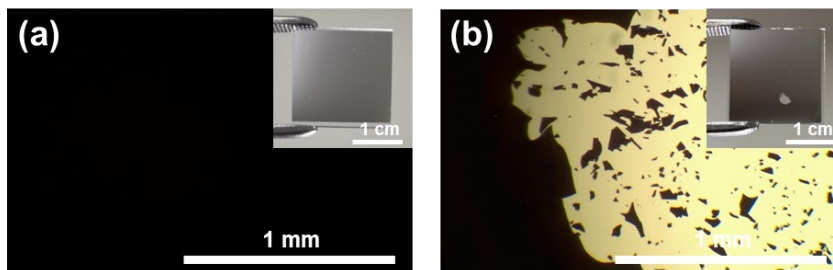

**Fig. S9.** Optical microscope images and digital images (inset) of Al electrode layer: (a) before, and (b) after 200,000 cycles of continuous operation.

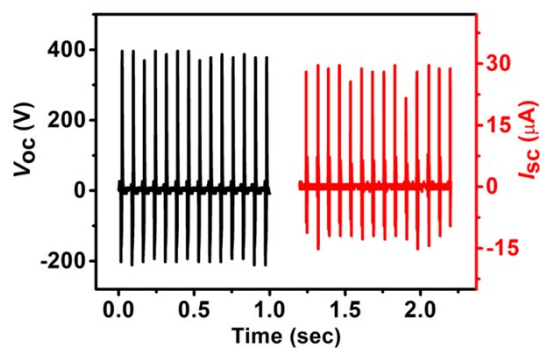

**Fig. S10.** Output characteristics of as-fabricated TENG based on  $F_{17}$  SAM modification layer.

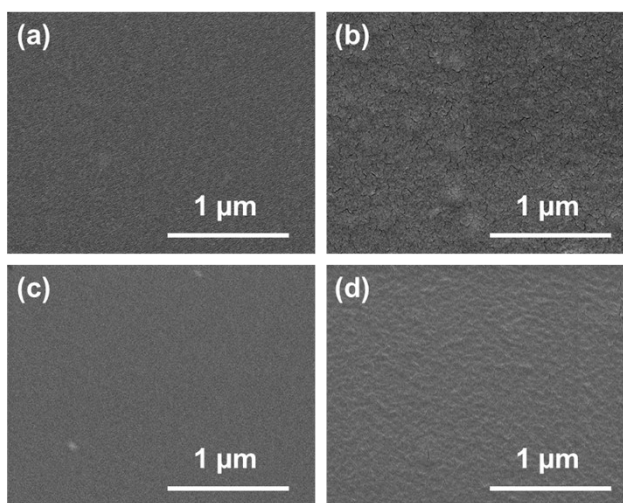

**Fig. S11.** SEM images of the samples before (left panel) and after (right panel) 200,000 cycles of continuous operation: (a, b) PDMS/ $F_{17}$  polymer and (c, d) PEDOT:PSS/cPLL.

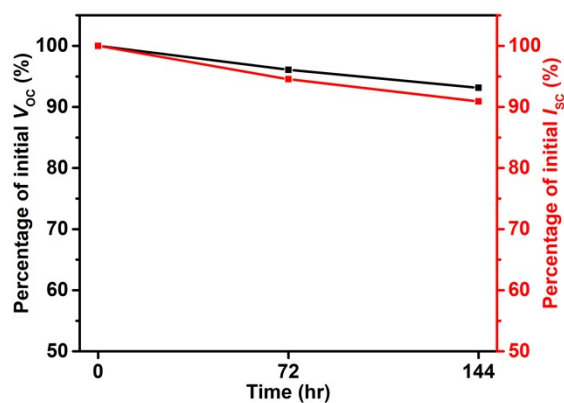

**Fig. S12.** Evolution of  $V_{oc}$  and  $I_{sc}$  of as-fabricated all-polymer flexible TENG (Device D) as a function of storage time under humid ambient conditions (25 °C, relative humidity = 70-80%).

## References

1. Y. Kim, D. Lee, J. Seong, B. Bak, U. H. Choi and J. Kim, *Nano Energy*, 2021, **84**, 105925.
2. C. Liu, J. Li, L. Che, S. Chen, Z. Wang and X. Zhou, *Nano Energy*, 2017, **41**, 359-366.
3. H. Park, S.-J. Oh, D. Kim, M. Kim, C. Lee, H. Joo, I. Woo, J. W. Bae and J.-H. Lee, *Advanced Science*, 2022, **9**, 2201070.
4. X. He, X. Mu, Q. Wen, Z. Wen, J. Yang, C. Hu and H. Shi, *Nano Res.*, 2016, **9**, 3714-3724.
5. Z. Zheng, D. Yu, B. Wang and Y. Guo, *Chem. Eng. J.*, 2022, **446**, 137393.
6. X. Liang, T. Zhao, W. Jiang, X. Yu, Y. Hu, P. Zhu, H. Zheng, R. Sun and C.-P. Wong, *Nano Energy*, 2019, **59**, 508-516.
7. B.-Y. Lee, S.-U. Kim, S. Kang and S.-D. Lee, *Nano Energy*, 2018, **53**, 152-159.
8. B. Kim, J. Y. Song, D. Y. Kim, M.-c. Kim, Z.-H. Lin, D. Choi and S. M. Park, *Nano Energy*, 2022, **104**, 107878.
